# Supplementary material for: Gaps in stroke knowledge attitude and practice among healthcare professionals in the West region of Cameroon
Source: Research Square preprint supplement (doi:10.21203/rs.3.rs-8370322/v1), 2026-01-13
Supplement: Supplementary file 1 [file f32c47b167225350bece9333.docx]

**Gaps in stroke knowledge attitude and practice among healthcare professionals in the West region of Cameroon**

Date :………/………../………….

**A: Identification**

Code:……………..

Age (years) :……………..

Sex: Male [ ] Female [ ]

Education level: Primary [ ] Secondary [ ] University [ ]

Health districts: Mbouda [ ] Mifi [ ]

Health profession:

Specialist physician [ ] General physician [ ]

State-registered nurses [ ] Senior nurses [ ]

Midwives [ ] Nursing assistants [ ] Other [ ]

Departments or units:

Internal medicine [ ] Surgery [ ] Pediatrics [ ]

Emergency [ ] Obstetrics and gynecology [ ] Multiple units [ ]

Other [ ]

Years of experience: ……………….

Sector of practice: Public [ ] Private confessional [ ] Private non-confessional [ ]

Level of heath care facilities:

2 [ ] 3 [ ] 4 [ ] 5 [ ] other [ ]

**B: MCQs**

**Section 1. Knowledge on stroke**

K1. According to the World Health Organization (WHO), stroke is best defined as:

1. Any sudden neurological symptoms lasting less than 24hours
2. A sudden onset of focal or global neurological deficit of vascular origin lasting more than 24hours or leading to death
3. Any brain injury cause by a trauma
4. Progressive neurological deterioration due to infection

K2. The 2 main types of strokes are:

1. Ischemic and hemorrhagic
2. Acute and chronic
3. Primary and secondary
4. Focal and generalized

K3. The primary organ damaged by stroke is the:

1. Heart
2. Lung
3. Brain
4. Kidneys

K4. The most common mechanisms of stroke are:

1. Blood vessel occlusion
2. Blood vessel rupture
3. Hypertension alone
4. Other

K5. From the following list, choose the frequent symptoms of stroke:

1. Motor weakness
2. Loss of consciousness
3. Gait imbalance
4. Aphasia
5. Blurred vision
6. Dizziness
7. Amnesia
8. Dysarthria
9. Dyspnea
10. Sensory disturbances
11. Chest pain
12. Vomiting
13. Fever

K6. From the following list, choose the frequent symptoms of stroke:

1. Bedsores
2. Depression
3. Raised intracranial pressure
4. Recurrence
5. Sphincter disorders
6. Erectile dysfunction
7. Dementia
8. Urinary tract infection
9. Deep vein thrombosis
10. Epilepsy
11. Pneumonia

**Section 2. Attitudes toward stroke**

A1. Choose what is a known risk factor of stroke in the following list:

1. Hypertension
2. Family history of stroke
3. Obesity
4. Age
5. Smoking
6. Alcohol
7. Diabetes
8. Cardiopathy
9. Vascular malformations
10. Sedentary lifestyle
11. Sex
12. Dyslipidemia
13. Anticoagulant medications
14. Carotid stenosis
15. Transient ischemic attack

A2. In the following list, choose the stroke preventive measures:

1. Regular physical exercise
2. Low salt diet
3. Antihypertensive treatment
4. Low fat diet
5. Smoking withdrawal
6. Antidiabetic treatment
7. Alcohol withdrawal

A3. Total recovery from stroke is possible?

1. Yes
2. No

**Section 2. Practice regarding stroke diagnosis management**

P1. The most appropriate first-line investigation to confirm the diagnosis of acute stroke is:

1. Brain CT scan
2. Skull X-ray
3. Serum electrolytes
4. Full blood count
5. Referral to another hospital

P2. When is the stroke confirmed where the patient is admitted?

1. Admission in intensive care unit
2. Refer the patient to another hospital
3. Admission in internal medicine
4. Admission in surgery

P3. What treatment option(s) do you recommend for stroke patients?

1. Medical
2. Surgical
3. Traditional healing
4. Spiritual healing

P4. Choose in the following proposition which management strategies can be used in acute stroke:

1. Blood pressure management
2. Rest
3. Oxygen support
4. Rehabilitation
5. Nursing
6. Cardiac monitoring
7. Blood sugar control
8. Maintenance of fluid and electrolyte balance
9. Airways and ventilation
10. Combating Hyperthermia in Acute Stroke
11. Recanalization and reperfusion

P5. What is the blood pressure (BP) threshold to initiate a BP management in acute ischemic stroke?

1. Systematically lower BP in case of high blood pressure (≥140/90 mmHg)
2. No blood pressure lowering at all
3. ≥210/110 mmHg
4. ≥240/140 mmHg
5. ≥230/130 mmHg
6. ≥220/120 mmHg

P6. What is the blood pressure (BP) threshold to initiate a BP management in acute hemorrhagic stroke?

1. Systematically lower BP in case of high blood pressure (≥140/90 mmHg)
2. No blood pressure lowering at all
3. ≥210/110 mmHg
4. ≥240/140 mmHg
5. ≥230/130 mmHg
6. ≥220/120 mmHg
